# Supplementary material for: Zinc Tolerance of Special Yeasts and Lactic Acid Bacteria for Use in the Food Industry
Source: MDPI journal article supplement (doi:10.3390/fermentation9060521), 2023-05-27
Supplement: s1 [file s1]

# Supplementary Material

## Zinc tolerance of special yeasts and lactic acid bacteria for use in the food industry

**Samantha Rossi**<sup>1</sup> <https://orcid.org/0000-0003-0254-6464>, **Maria Maares**<sup>2</sup> <https://orcid.org/0000-0002-9140-2448>, **Helena Kieserling**<sup>3</sup> <https://orcid.org/0000-0002-8093-6794>, **Sascha Rohn**<sup>3</sup> <https://orcid.org/0000-0002-5009-8830>, **Oliver Schlüter**<sup>4</sup> <https://orcid.org/0000-0001-8958-5815>, **Francesca Patrignani**<sup>1,5</sup> <https://orcid.org/0000-0002-6688-2638>, **Rosalba Lanciotti**<sup>1,5</sup> <https://orcid.org/0000-0002-1592-4674>, **Hajo Haase**<sup>2</sup> <https://orcid.org/0000-0002-1622-8718>, **Claudia Keil**<sup>2\*</sup> <https://orcid.org/0000-0003-0317-0905>

<sup>1</sup> Campus Food Science, Department of Agricultural and Food Sciences, Alma Mater Studiorum, University of Bologna, p.zza Goidanich 60, 47521 Cesena, Italy; samantha.rossi2@unibo.it (S.R.); francesca.patrignani@unibo.it (F.P.); rosalba.lanciotti@unibo.it (R.L.)

<sup>2</sup> Technische Universität Berlin, Institute of Food Technology and Food Chemistry, Department of Food Chemistry and Toxicology, Straße des 17. Juni 135, 10623 Berlin, Germany; c.keil@tu-berlin.de (C.K.); maares@tu-berlin.de (M.M.); haase@tu-berlin.de (H.H.)

<sup>3</sup> Technische Universität Berlin, Institute of Food Technology and Food Chemistry, Department of Food Chemistry and Analysis, Straße des 17. Juni 135I, 10623 Berlin, Germany; helena.schestkowa@tu-berlin.de (H.K.); rohn@tu-berlin.de (S.Ro.)

<sup>4</sup> Leibniz Institute for Agricultural Engineering and Bioeconomy, Quality and Safety of Food and Feed, Potsdam, Germany; oschlueter@atb-potsdam.de (O.S.)

<sup>5</sup> Interdepartmental Centre for Agri-Food Industrial Research, University of Bologna, Quinto Bucci 336, 47521 Bologna, Italy

\* Correspondence: c.keil@tu-berlin.de (C.K.); Tel.: +49 (0) 30 31472816; Fax: +49 (0) 30 31472823

**Table S1: Results of a two-way ANOVA on growth of yeast and lactic acid bacteria during the Zn-enrichment procedure analyzed by OD600 measurement (see Fig. 1)**

|                                            | <i>Y. lipolytica</i> RO25 | <i>K. unispora</i> FM2 | <i>K. servazzii</i> KAZ2 | <i>F. sanfranciscensis</i> DG1 |
|--------------------------------------------|---------------------------|------------------------|--------------------------|--------------------------------|
| <b>0 mM ZnSO<sub>4</sub></b>               |                           |                        |                          |                                |
| start vs. before Zn <sup>2+</sup> addition | 0.59                      | <0,001                 | 0.03                     | 0.04                           |
| start vs end                               | <0.001                    | <0.001                 | <0.001                   | <0.001                         |
| before Zn <sup>2+</sup> addition vs. end   | <0.001                    | <0.001                 | <0.001                   | <0.001                         |
| <b>0.5 mM ZnSO<sub>4</sub></b>             |                           |                        |                          |                                |
| start vs. before Zn <sup>2+</sup> addition | 0.51                      | 0.01                   | 0.006                    | n.a.                           |
| start vs end                               | <0.001                    | <0.001                 | <0.001                   | n.a.                           |
| before Zn <sup>2+</sup> addition vs. end   | <0.001                    | <0.001                 | <0.001                   | n.a.                           |
| <b>1 mM ZnSO<sub>4</sub></b>               |                           |                        |                          |                                |
| start vs. before Zn <sup>2+</sup> addition | 0.45                      | 0.02                   | 0.02                     | n.a.                           |
| start vs end                               | <0.001                    | <0.001                 | <0.001                   | n.a.                           |
| before Zn <sup>2+</sup> addition vs. end   | <0.001                    | <0.001                 | <0.001                   | n.a.                           |
| <b>2.5 mM ZnSO<sub>4</sub></b>             |                           |                        |                          |                                |
| start vs. before Zn <sup>2+</sup> addition | 0.51                      | 0.01                   | 0.01                     | n.a.                           |
| start vs end                               | <0.001                    | <0.001                 | <0.001                   | n.a.                           |
| before Zn <sup>2+</sup> addition vs. end   | <0.001                    | <0.001                 | <0.001                   | n.a.                           |
| <b>5 mM ZnSO<sub>4</sub></b>               |                           |                        |                          |                                |
| start vs. before Zn <sup>2+</sup> addition | 0.45                      | 0.01                   | 0.007                    | 0.02                           |
| start vs end                               | <0.001                    | <0.001                 | <0.001                   | <0.001                         |
| before Zn <sup>2+</sup> addition vs. end   | <0.001                    | 0.07                   | 0.32                     | <0.001                         |
| <b>10 mM ZnSO<sub>4</sub></b>              |                           |                        |                          |                                |
| start vs. before Zn <sup>2+</sup> addition | 0.43                      | 0.009                  | 0.01                     | 0.02                           |
| start vs end                               | <0.001                    | <0.001                 | <0.001                   | <0.001                         |
| before Zn <sup>2+</sup> addition vs. end   | 0.007                     | 0.01                   | 0.10                     | <0.001                         |
| <b>20 mM ZnSO<sub>4</sub></b>              |                           |                        |                          |                                |
| start vs. before Zn <sup>2+</sup> addition | n.a.                      | n.a.                   | n.a.                     | 0.02                           |
| start vs end                               | n.a.                      | n.a.                   | n.a.                     | <0.001                         |
| before Zn <sup>2+</sup> addition vs. end   | n.a.                      | n.a.                   | n.a.                     | <0.001                         |

A two-way ANOVA was performed to analyze the effect of time and zinc treatment on growth of *Yarrowia lipolytica* RO25, *Kazachstania unispora* FM2, *Kazachstania servazzii* KAZ2 and *Fructilactobacillus sanfranciscensis* DG1. p-values for the statistical significance of the cell enrichment at the respective times of microorganism cultivation are shown (Two-Way ANOVA with Tukey's Multiple Comparison Test) are indicated.; n.a. = not analyzed
